# Supplementary material for: Bubble-propelled trimetallic microcaps as functional catalytic micromotors
Source: Royal Society of Chemistry journal article supplement (doi:10.1039/c4ra16589f), 2015-01-01
Supplement: c4ra16589f1.pdf [file c4ra16589f1.pdf]

# Bubble-propelled tri-metallic microcaps as functional catalytic micromotors

M. Safdar,<sup>a</sup> T. Itkonen,<sup>b</sup> J. Jänis<sup>a\*</sup>

<sup>a</sup> Department of Chemistry, University of Eastern Finland, P.O. Box 111, FI-80101 Joensuu, Finland.;

<sup>b</sup> Department of Physics and Mathematics, University of Eastern Finland, P.O. Box 111, FI-80101 Joensuu, Finland.

\*Corresponding author: [janne.janis@uef.fi](mailto:janne.janis@uef.fi)

## *Supplementary Information*

1. Description of supporting videos
2. Experimental details
3. EDX Results

### 1. Description of supporting videos

**Video S1.** Random motion of microcap motor in the absence of magnetic field.

**Video S2.** Directed motion of microcap motor using an external magnet.

**Video S3.** Capture and transport of an oil droplet by alkanethiol modified microcap motor.

**Video S4.** Unmodified microcap motors encountering oil droplets during motion.

### 2. Experimental details:

#### **Materials and equipment:**

Silica particles and sodium hydroxide were purchased from Alfa Aesar (catalogue No. 45830) and Sigma Aldrich, respectively. 1-dodecanthiol was obtained from Sigma Aldrich. Emitech K675X sputter coater and Cressington 208HR sputtering systems were used to deposit Ni and Pt/Au layers, respectively. Video sequences were recorded at 25 frames per second using Olympus BX51 microscope (5X and 10X objective) and a Thorlabs DCC1645C Compact CMOS camera. Microcaps were characterized by using Hitachi S4800 Field Emission-Scanning Electron Microscope equipped with an energy dispersive X-ray spectrometer.

#### **Video editing and motion tracking:**

VirtualDub 1.10.4 was used to edit videos and FiJi free software was used to track speeds of microcap motors and to extract images.

#### **Microfluidic device fabrication:**

Microfluidic chip was fabricated by soft lithography and replica molding. A mixture of PDMS Sylgard 184 was prepared by mixing polymer and curing agent in the ratio of 10:1. After degassing in a desiccator and

pouring over the master mold, the sample was cured at 65° C for 3 h, cooled down and peeled-off from the master. After punching the holes, PDMS and a cleaned glass slide were treated with oxygen plasma for 1 min to activate the surface. Afterwards, the PDMS piece was irreversibly bounded to the glass slide.

### 3. EDX analysis:

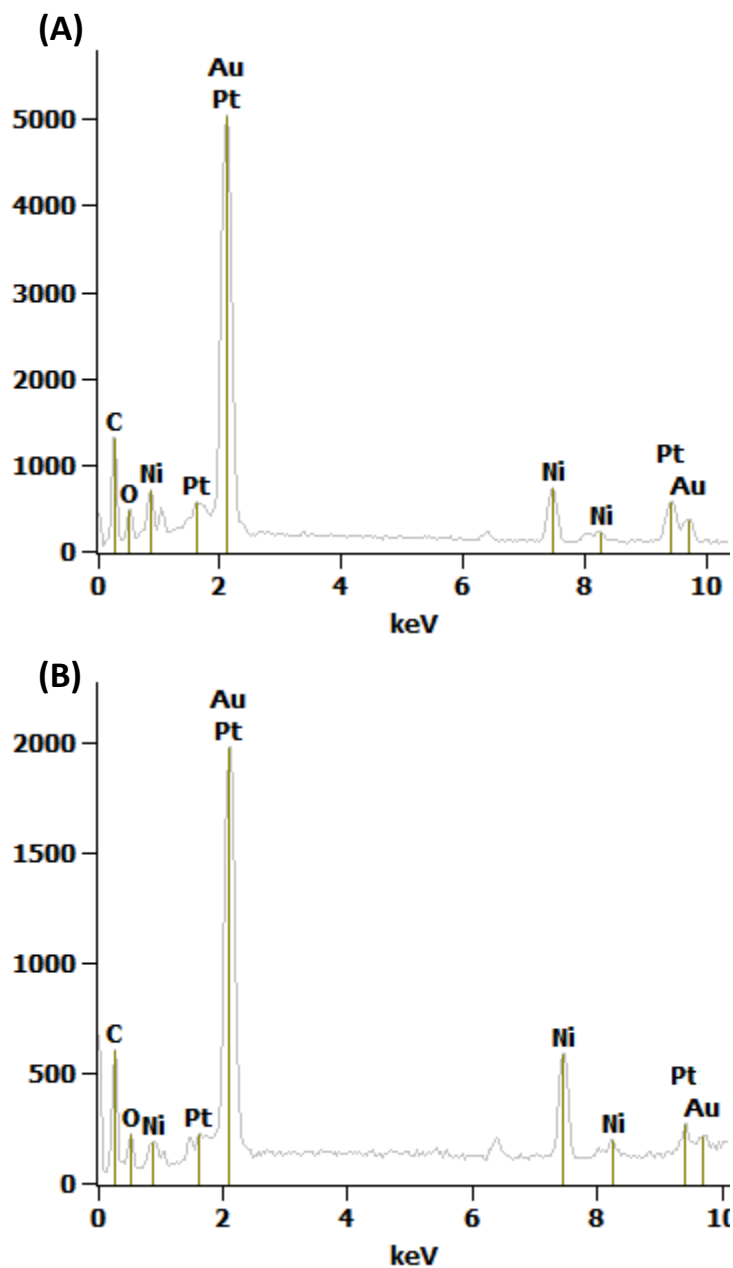

Fig. S1 EDX analysis of, (A) Convex-Pt and (B) concave-Pt microcaps.
